# Supplementary material for: RETRACTED ARTICLE: LRPPRC regulates malignant behaviors, protects mitochondrial homeostasis, mitochondrial function in osteosarcoma and derived cancer stem-like cells
Source: Springer Nature journal article supplement (doi:10.1186/s12885-023-11443-8), 2023-10-03

$\beta$ -Actin

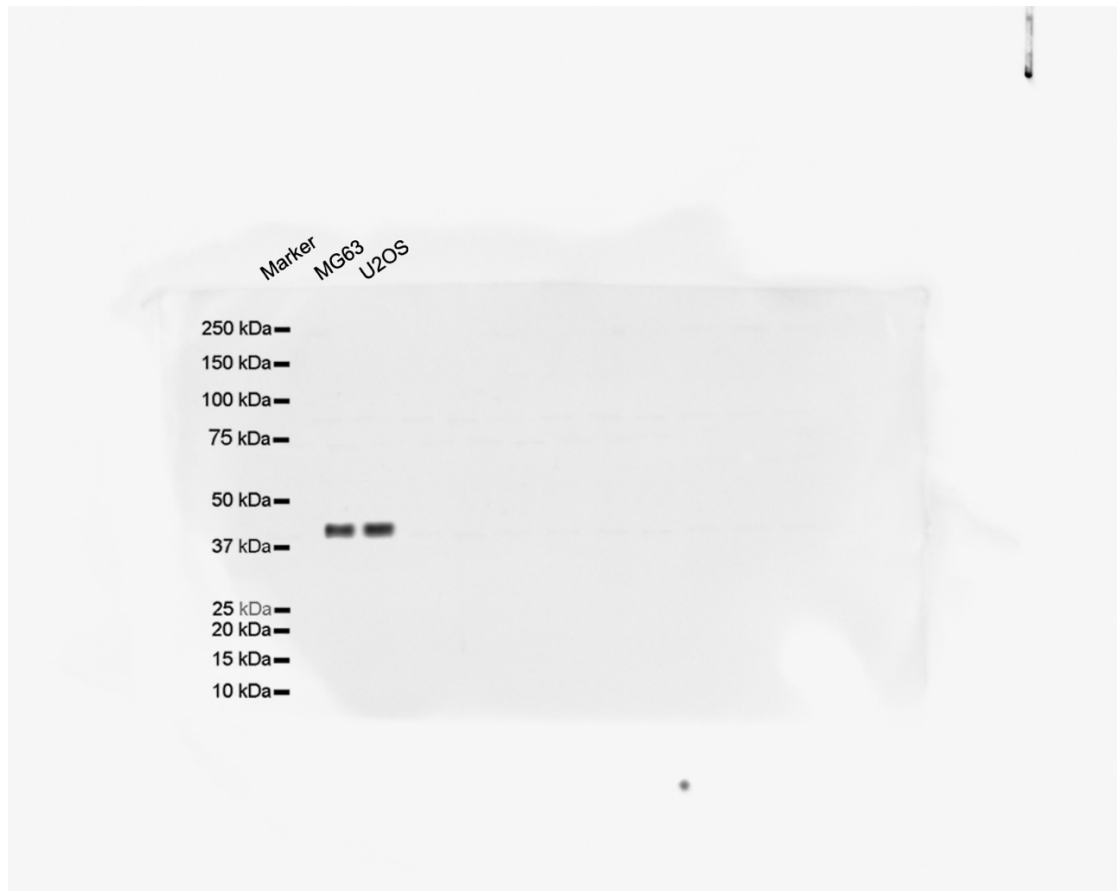

# Catalase

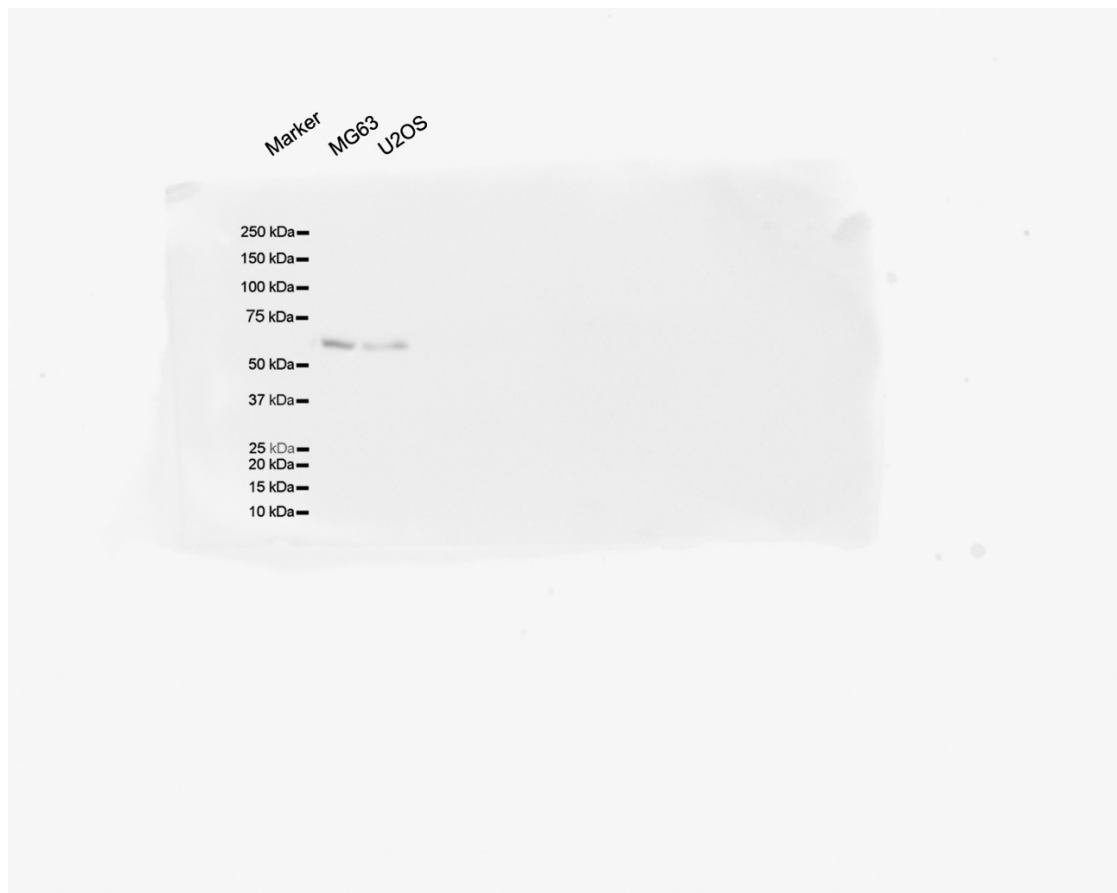

FOXM1

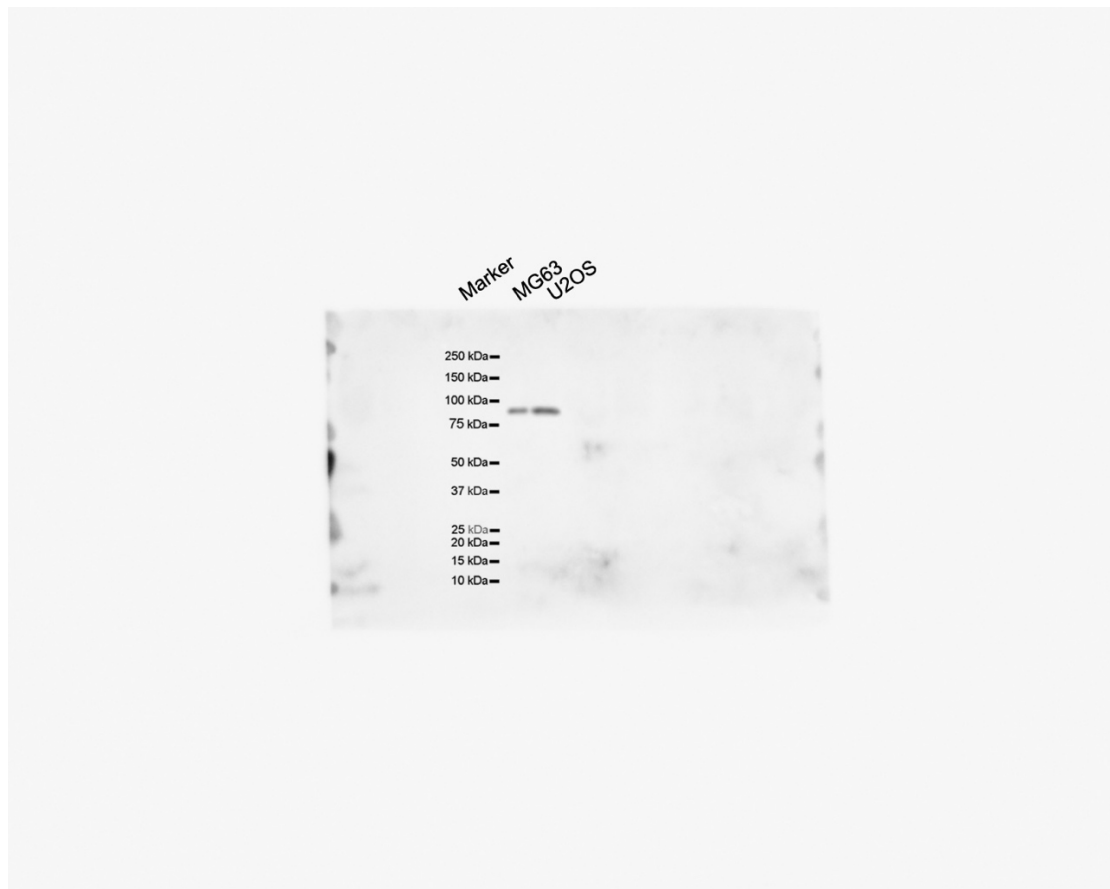

LRPPRC

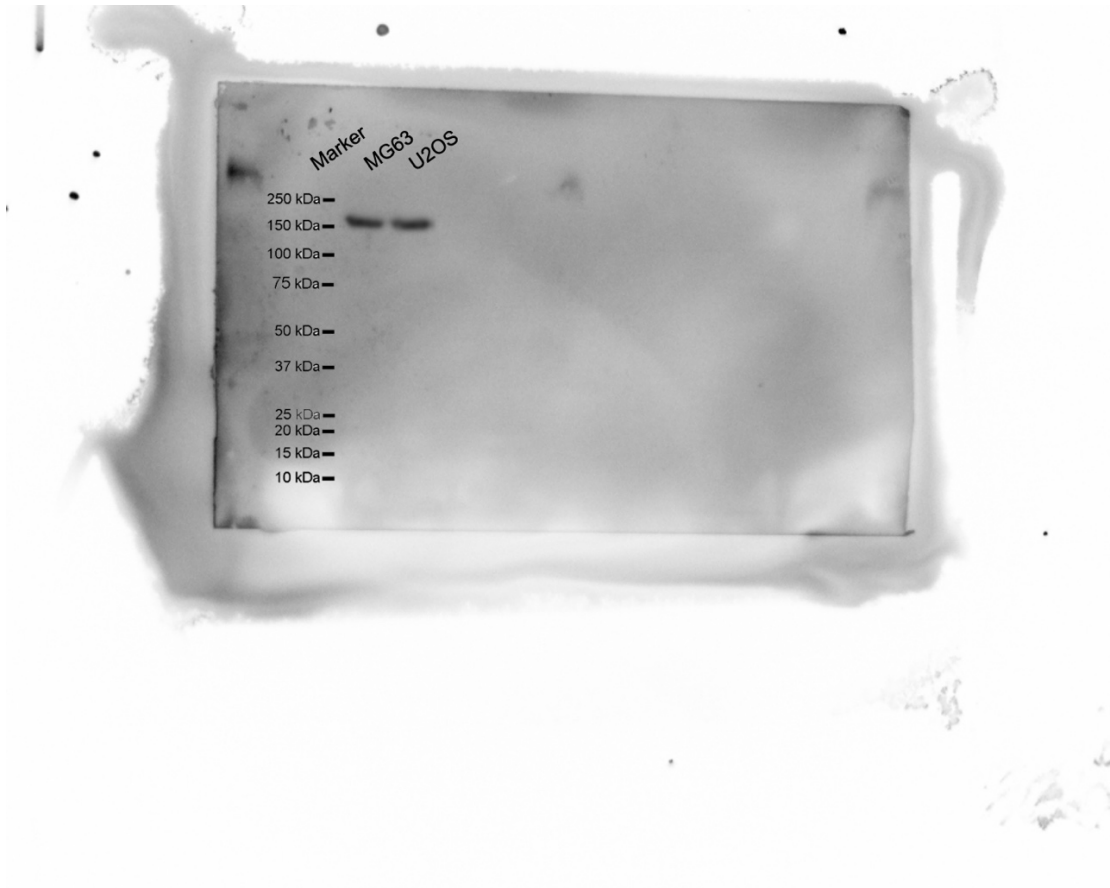

Nanog

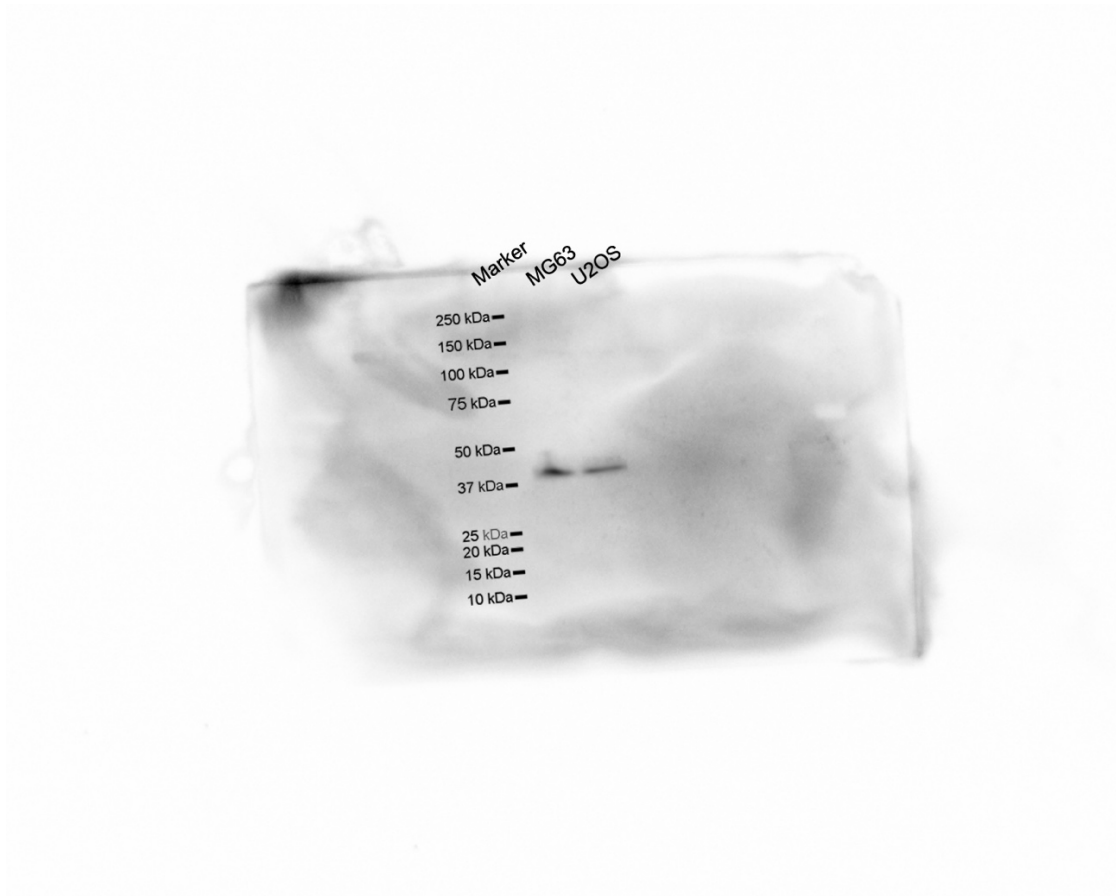

Oct4

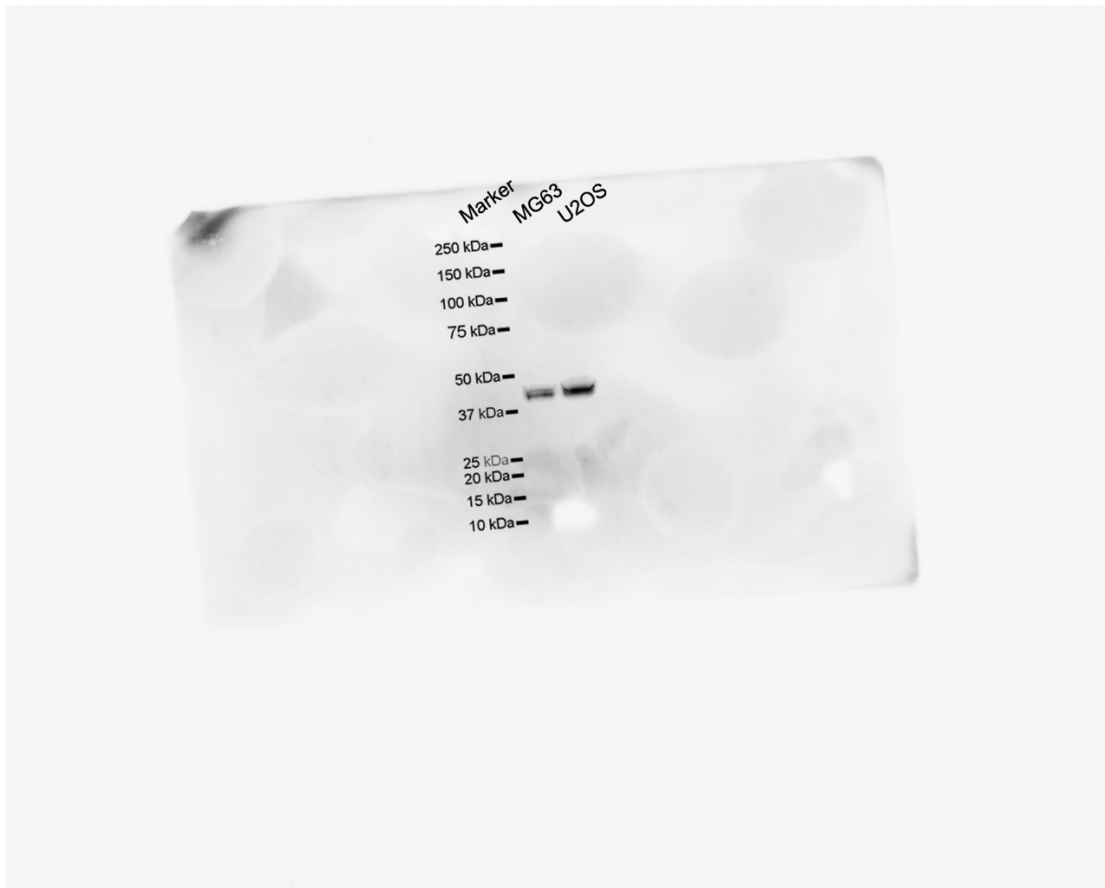

PRDX3

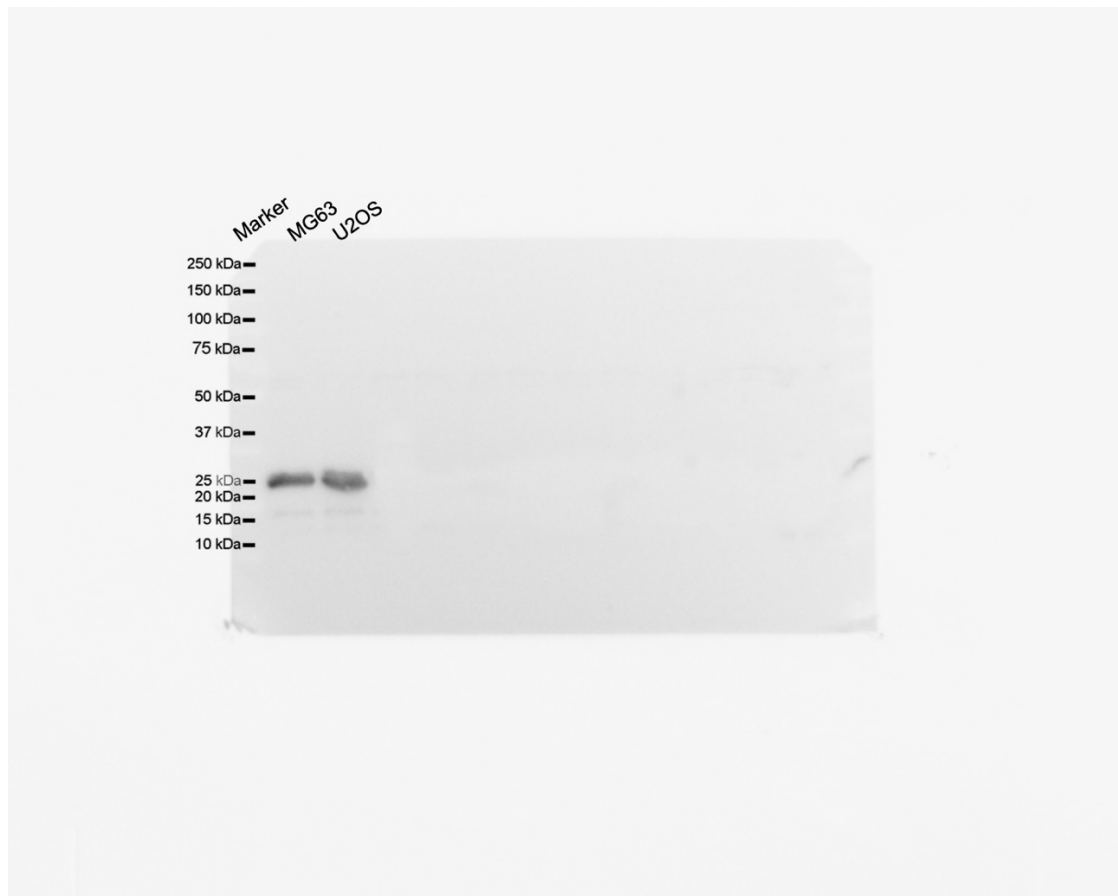

SOD2

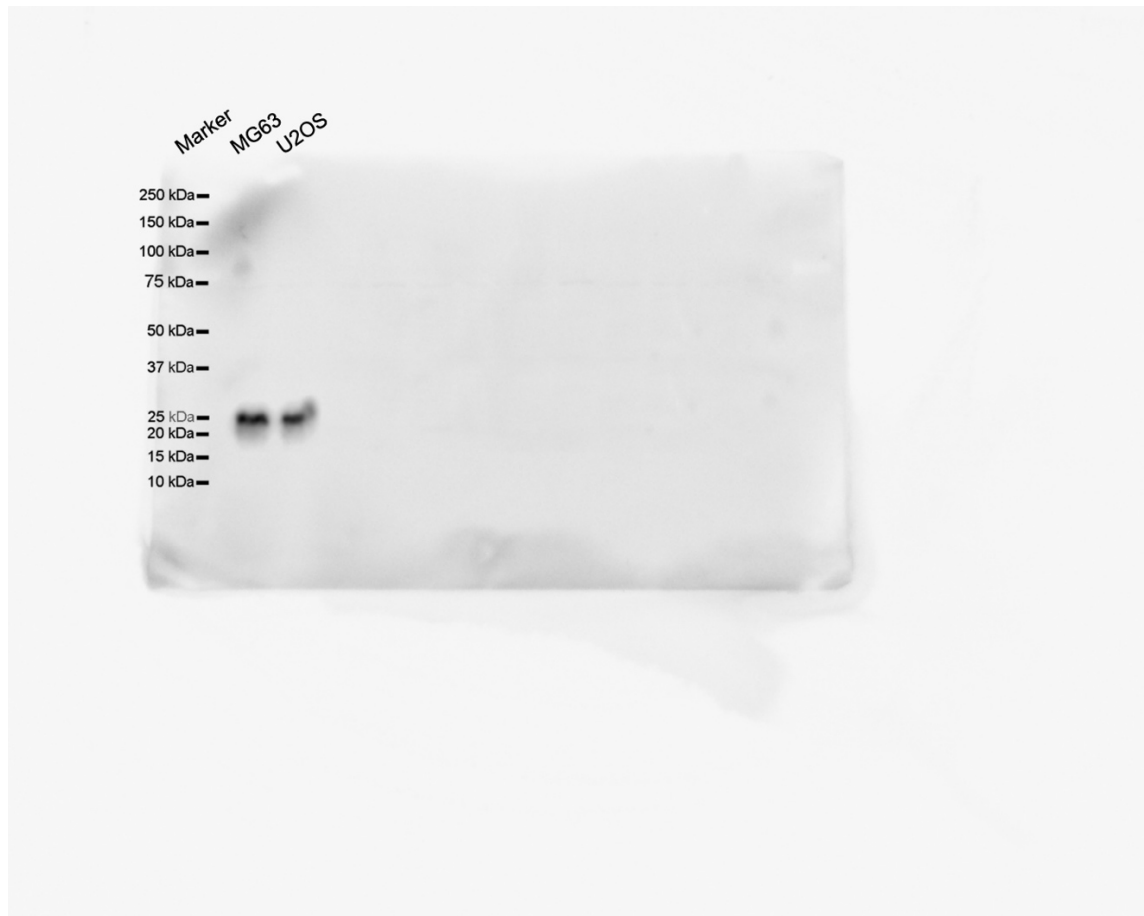



SOX2

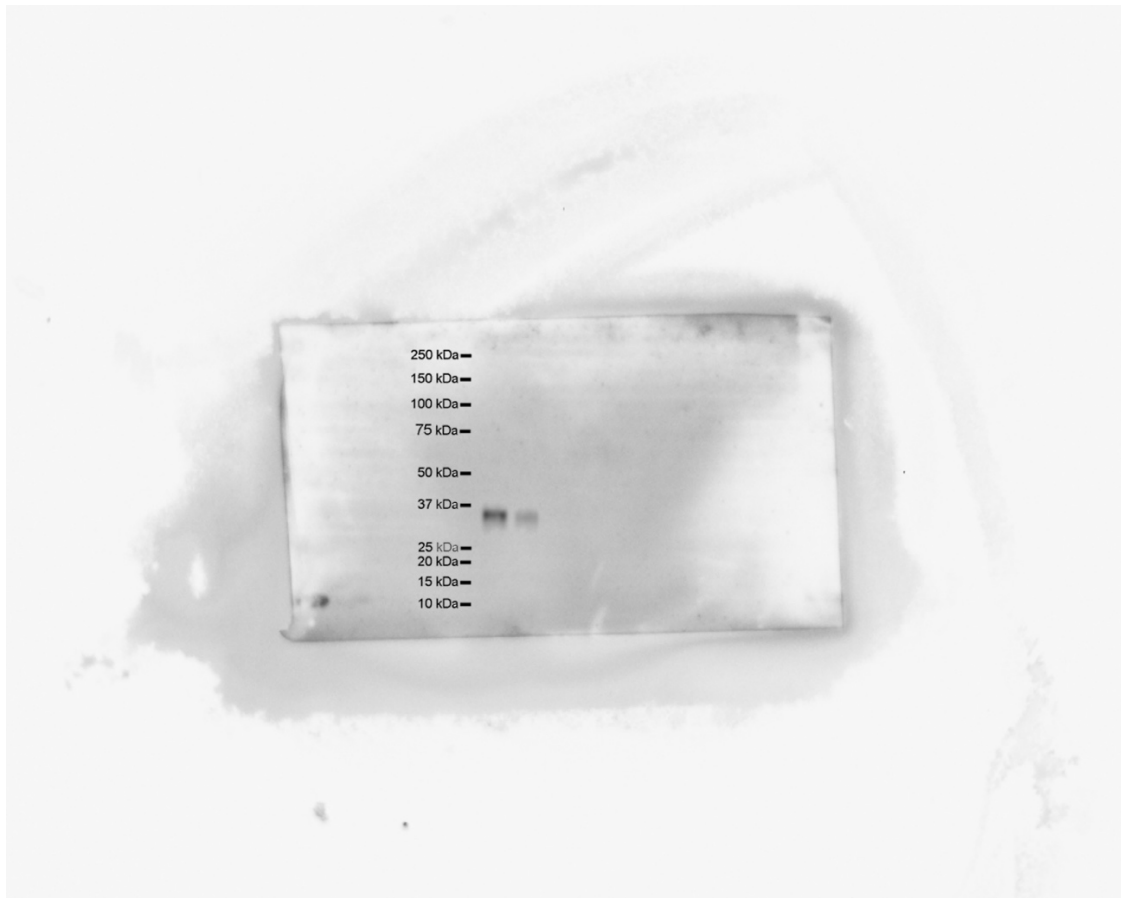

Fig 1a actin

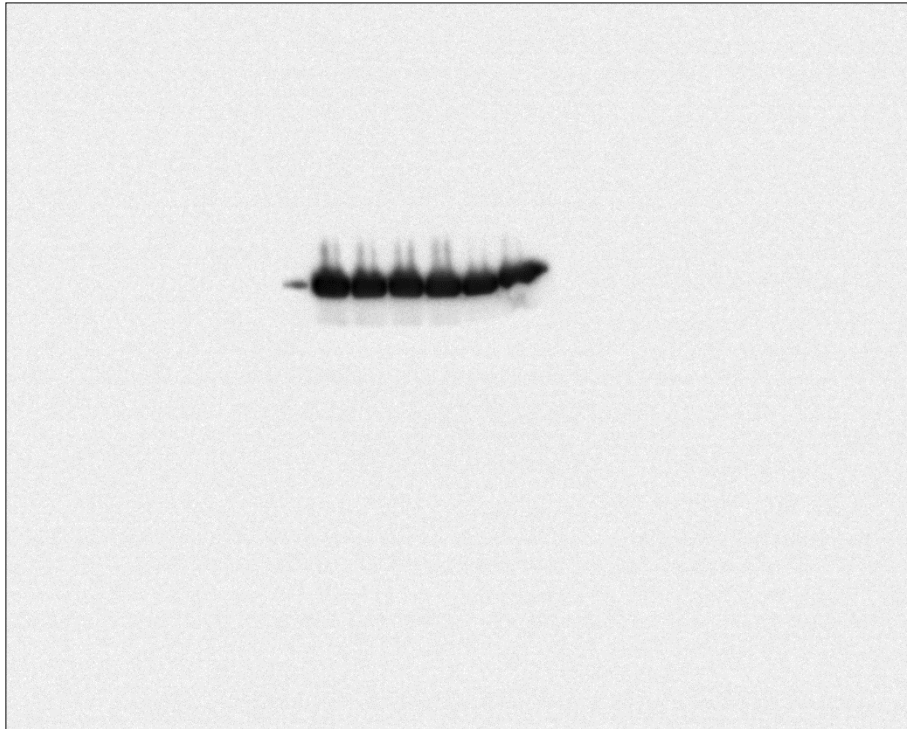

Fig 1a LRPPRC

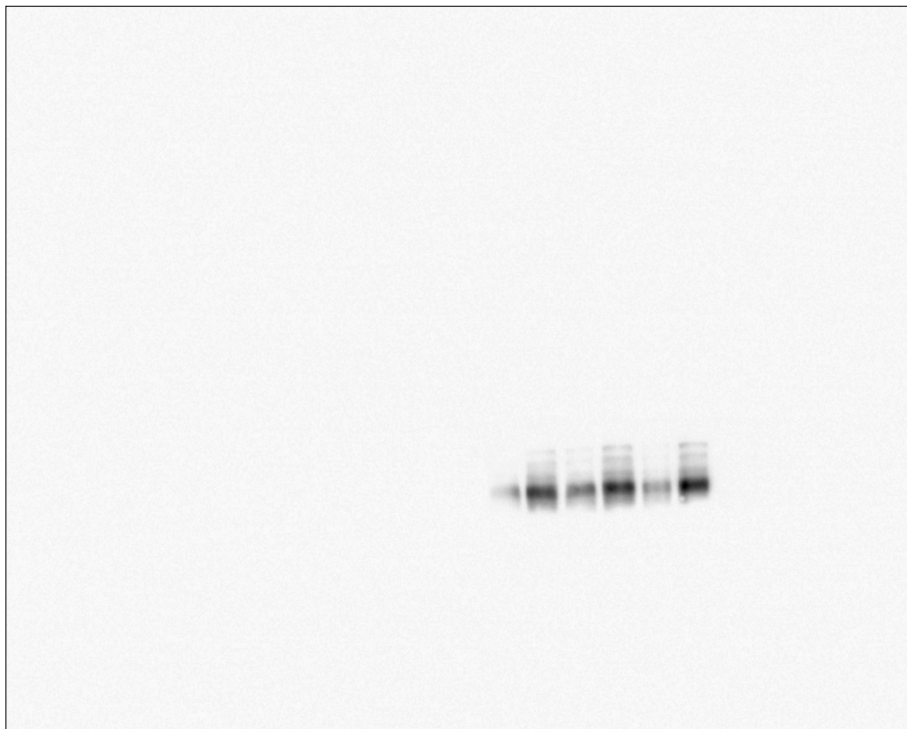

Fig 1C actin

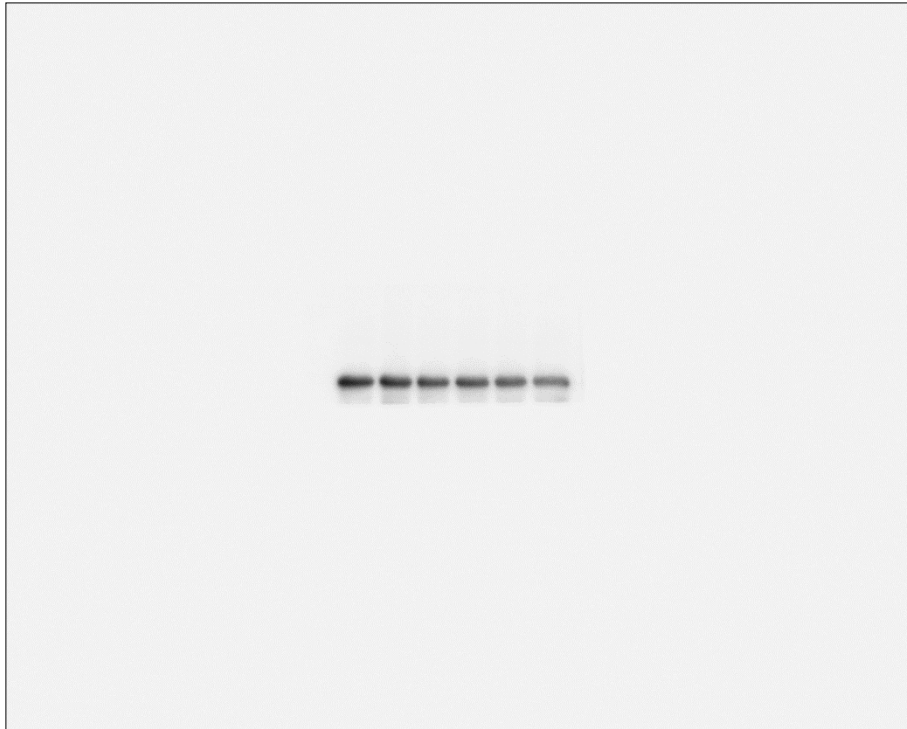

Fig 1c LRPPRC

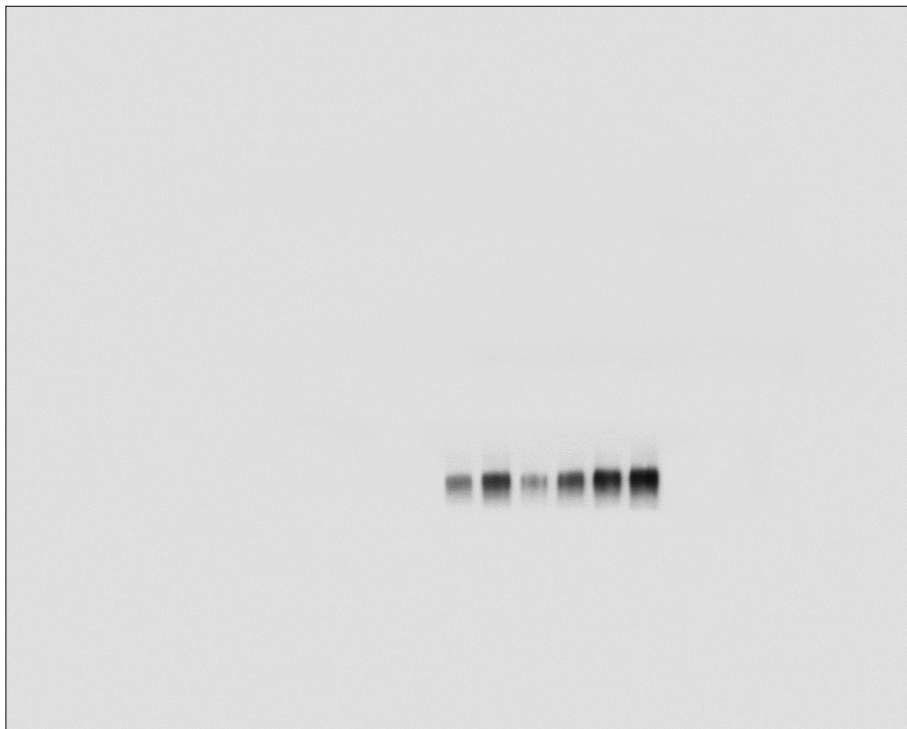

Fig 1C, Nanog

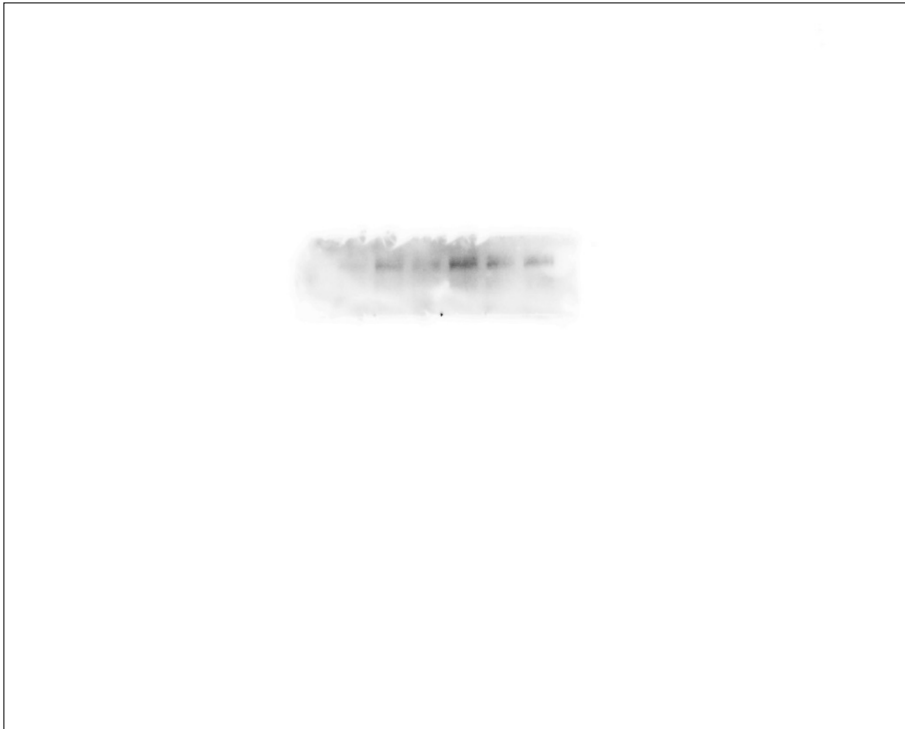

Fig 1c, Oct4

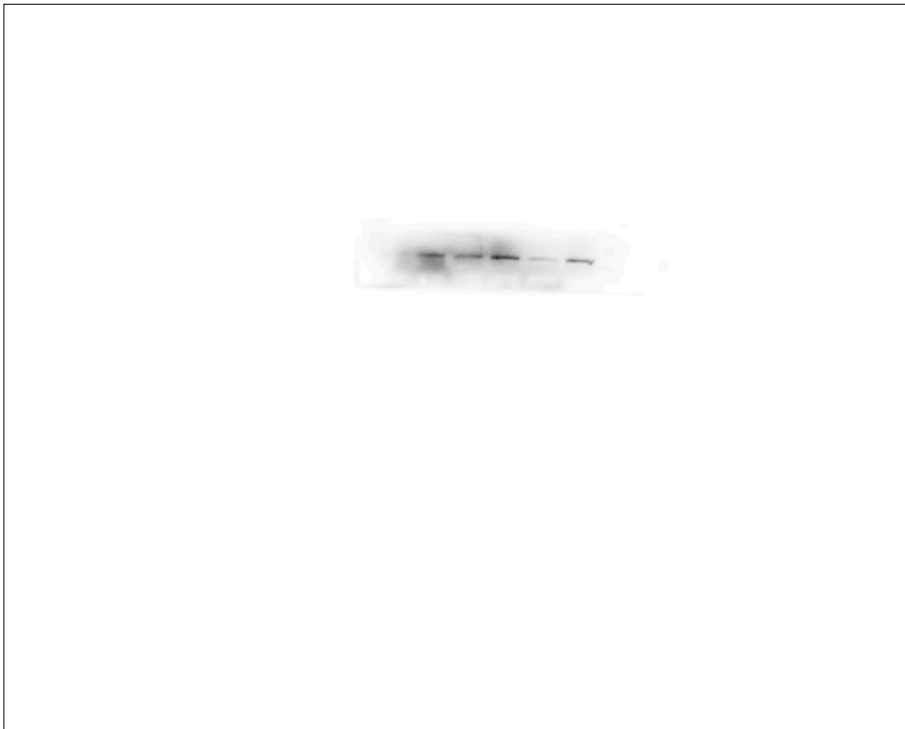

Fig 1C Sox2

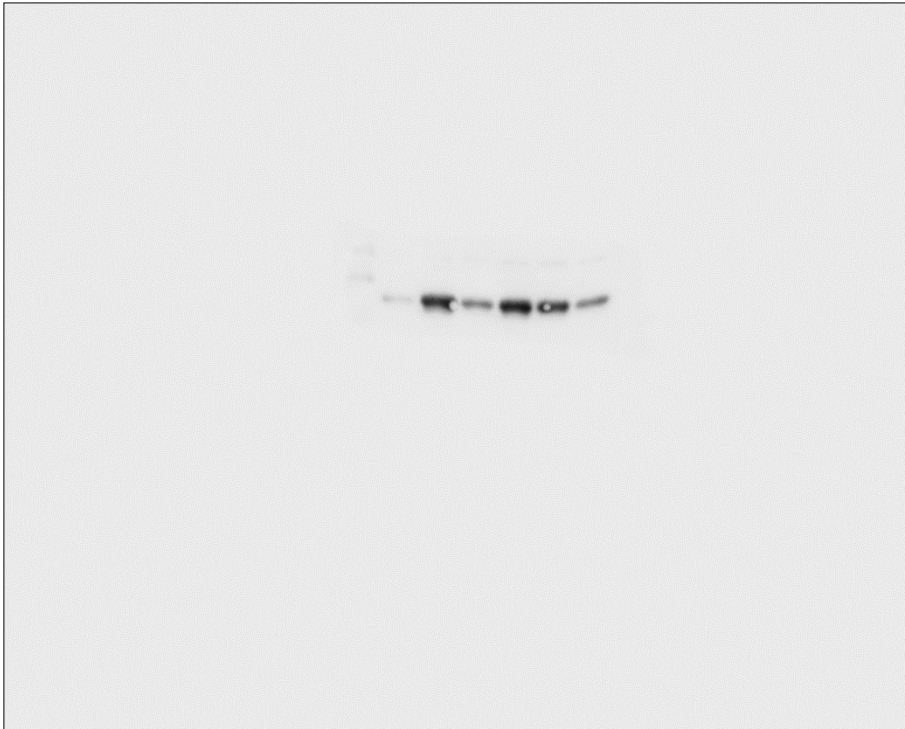

Fig 2a actin

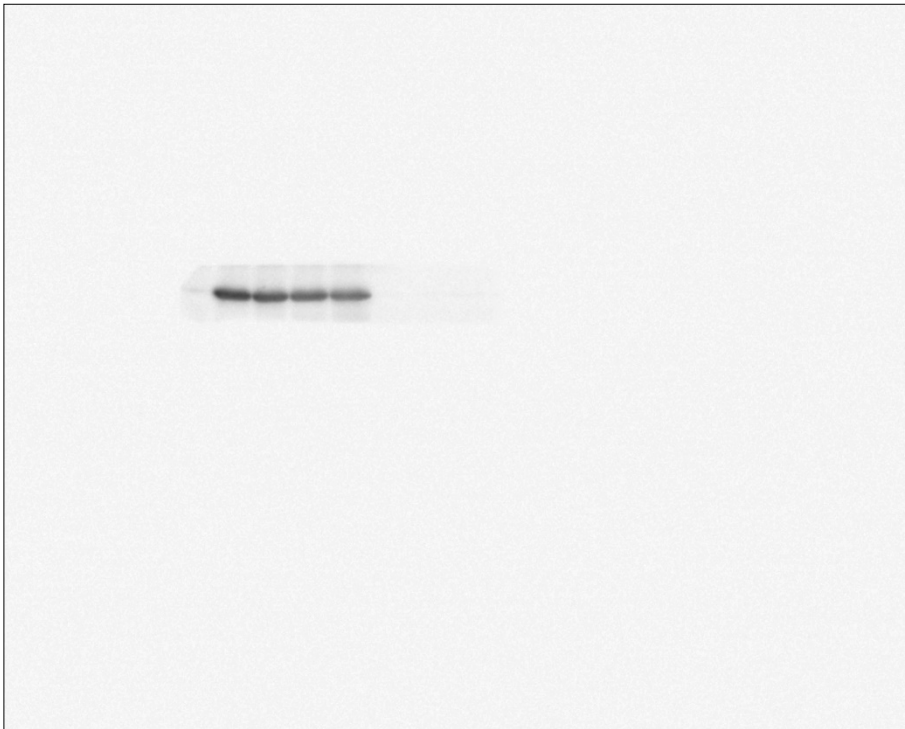

Fig 2b. LRPPRC

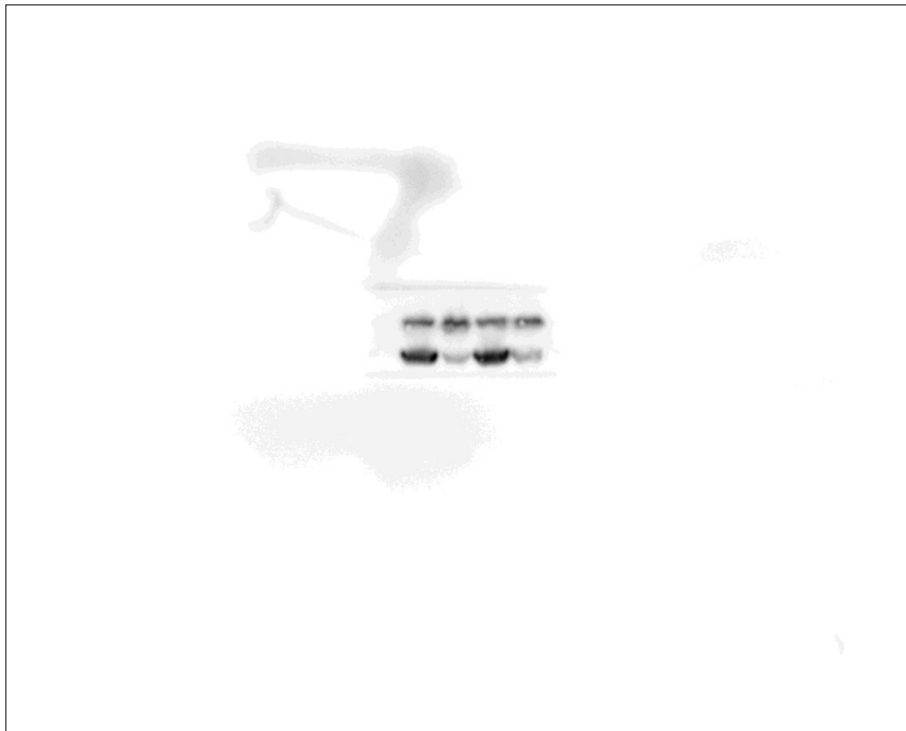

Fig 3b, actin

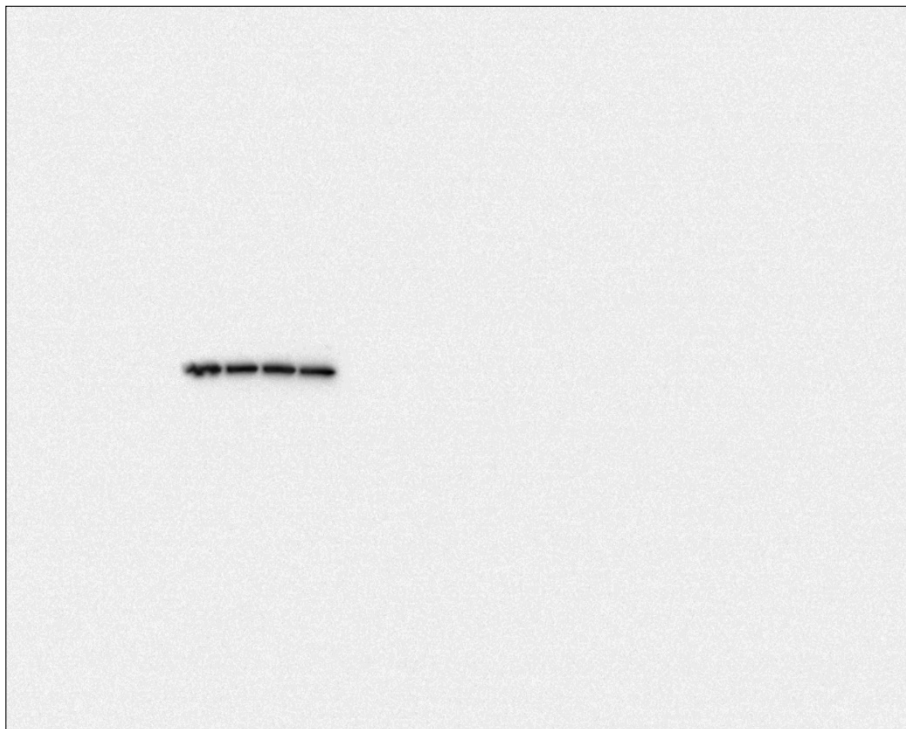

Fig 3b LRPPRC

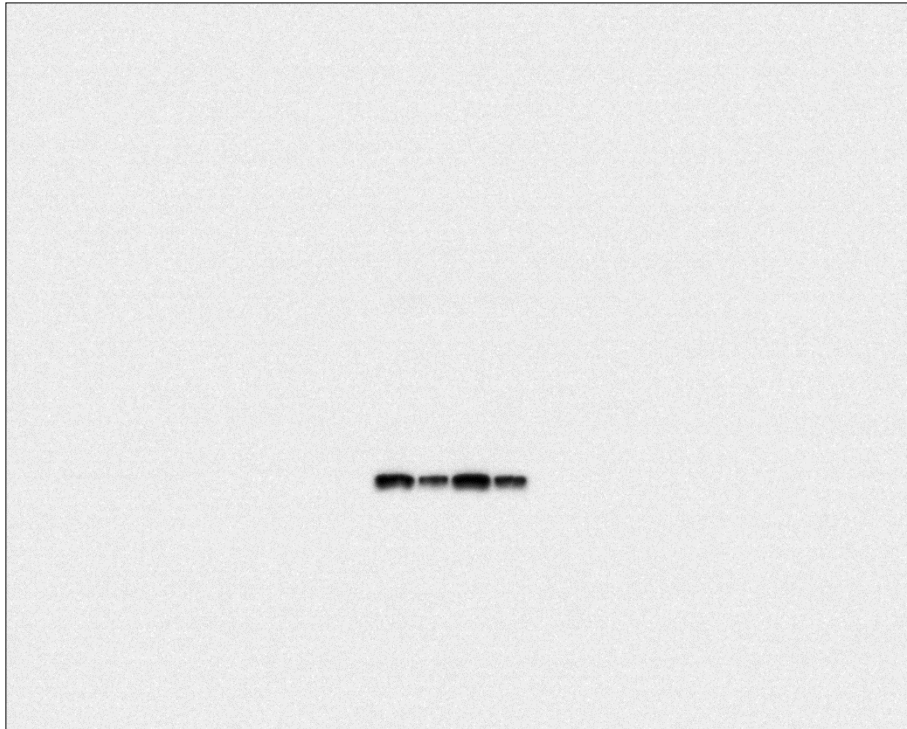

Fig 4a actin

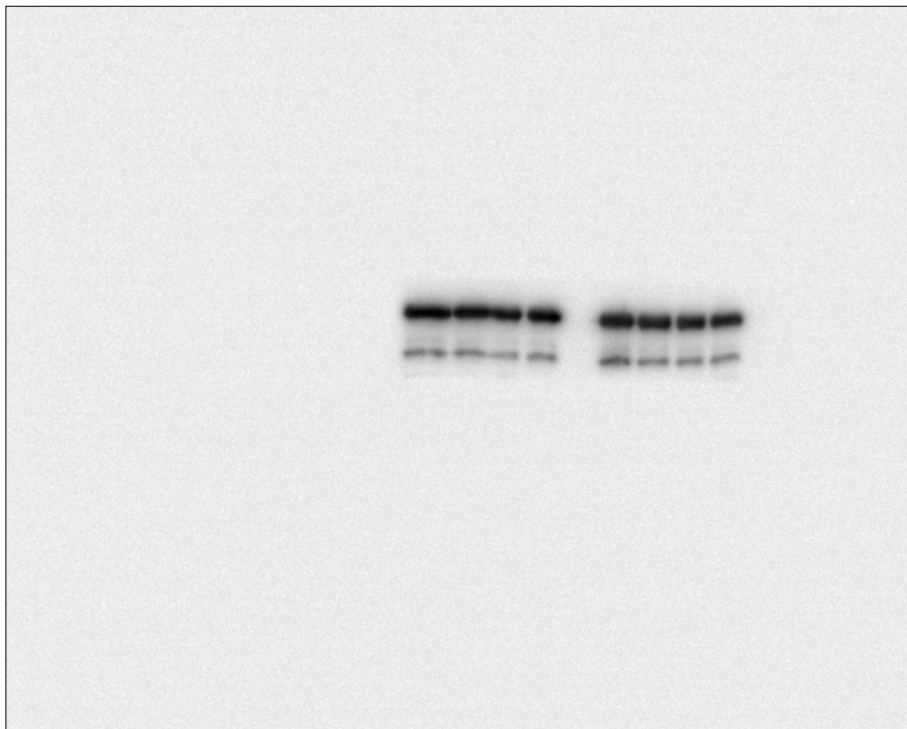

Fig 4a catalase

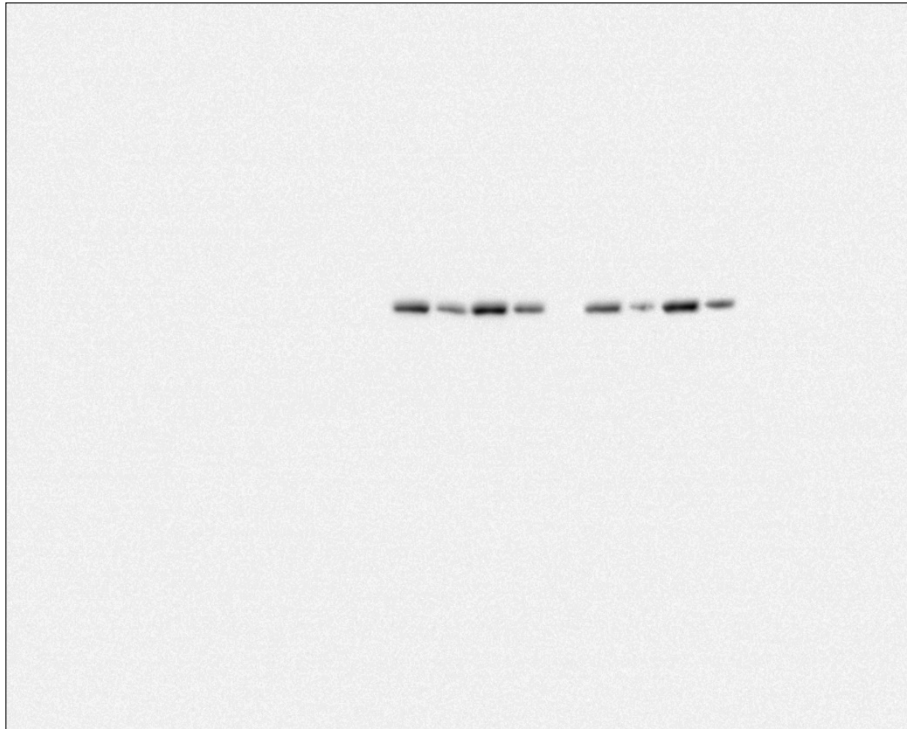

Fig 4a FOXM1

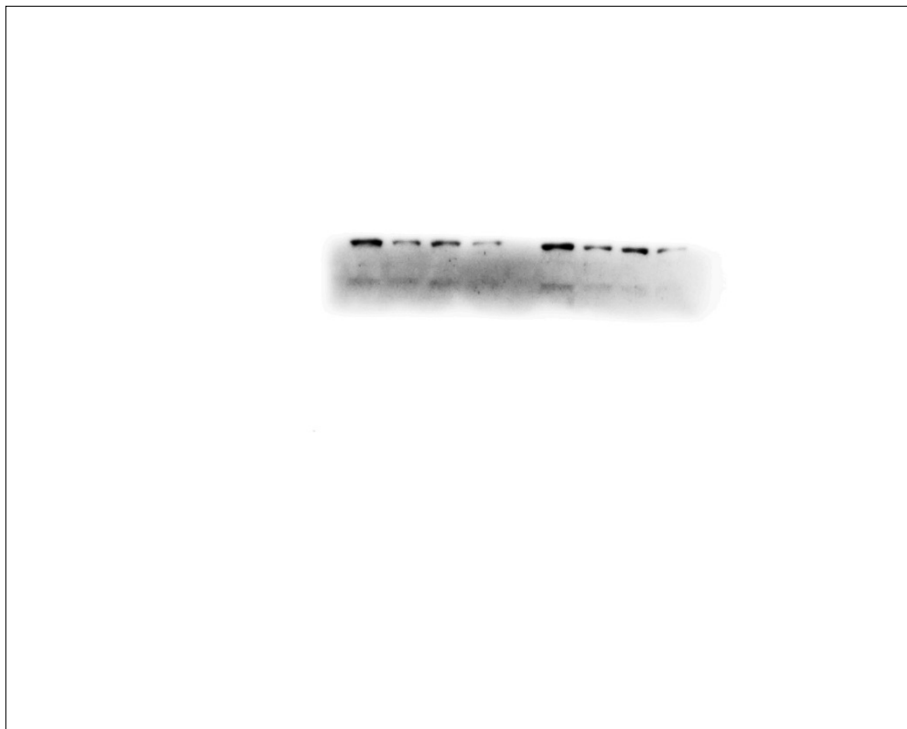



Fig 4a, MnSOD

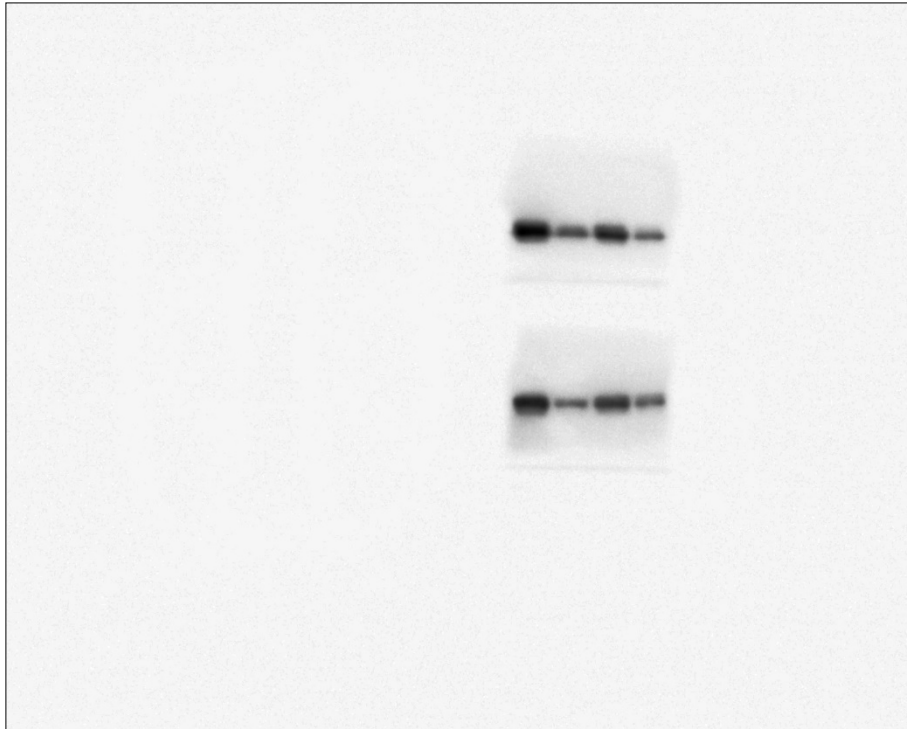

Fig 4a PRDX3

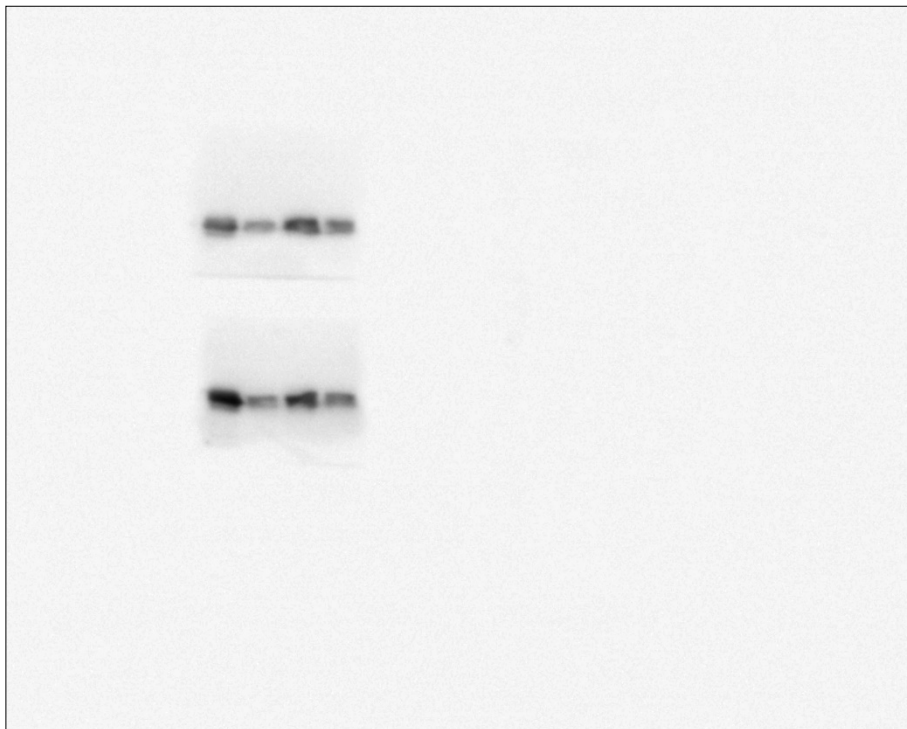

Supplement: MOESM1 [file 26120342]
